1 Original Article

2 **Ozone mediates tumor-selective cell death caused by air plasma-activated medium**  
3 **independently of NOx**

4 Manami Suzuki-Karasaki<sup>1,2,3</sup>, Yushi Ochiai<sup>3</sup>, Shizuka Innami<sup>3</sup>, Hiroshi Okajima<sup>3,4</sup>, Miki  
5 Suzuki-Karasaki<sup>3</sup>, Hideki Nakayama<sup>2</sup>, Yoshihiro Suzuki-Karasaki<sup>3</sup>#

6 <sup>1</sup>Graduate School of Medical Sciences, Kumamoto University, Kumamoto, Japan

7 <sup>2</sup>Department of Oral and Maxillofacial Surgery, Faculty of Life Sciences, Kumamoto University,  
8 Kumamoto, Japan.

9 <sup>3</sup>Department of Research and Development, Plasma ChemiBio Laboratory, Nasushiobara, Tochigi,  
10 Japan.

11 <sup>4</sup>Communication&Control Systems Company, Tokyo Keiki Incorporation, Tokyo, Japan

12 #Corresponding author: Yoshihiro Suzuki-Karasaki, Ph.D., Plasma ChemiBio Laboratory, 398  
13 Takaatsu, Nasushiobara 329-2813, Tochigi, Japan.

14 E-mail: [suzuki.pcbi@gmail.com](mailto:suzuki.pcbi@gmail.com)

15 Keywords: cancer; dissolved ozone; tumor-specificity; anticancer; monopolar perinuclear  
16 mitochondrial clustering; plasma-activated medium

17 **Abbreviations.** 7-AAD, 7-amino-actinomycin D; APAM, air plasma-activated medium; CAP, cold  
18 atmospheric plasma; CL, cardiolipin; Drp, dynamin-related protein; Fer-1, ferrostatin-1, Hoe,  
19 Hoechst 33342; LPO, lipid peroxide; MitoSOX, MitoSOX Red CMXRos; MPMC, monopolar  
20 perinuclear mitochondrial clustering; mROS, mitochondrial reactive oxygen species; MTR,  
21 MitoTracker Red; nROS, nuclear reactive oxygen species; NAC, *N*-acetylcysteine NAO, 10-*N*-nonyl  
22 acridine orange; NAC, *N*-acetylcysteine; NC, Nocodazole; OC, oral cancer; OS, osteosarcoma;  
23 PNMC, perinuclear mitochondrial clustering; TTG, tubulin tracker green.

24 **Abstract**

25 Cold atmospheric plasma and plasma-treated liquids (PTLs) are emerging promising tools for  
26 tumor-targeted cancer treatment, as they preferentially injure tumor cells more than  
27 non-malignant cells. Oxidative stress is critical to the antitumor effect, but the oxidant mediating  
28 the effect is debatable. Previously, we reported that air plasma-activated medium (APAM) has  
29 tumor-selective cytotoxicity in vitro and in vivo. Moreover, an unusual mitochondrial positioning  
30 named monopolar perinuclear mitochondrial clustering (MPMC) and nuclear damage proceeds  
31 to cell death. We noticed that air plasma generation was accompanied by ozone (O<sub>3</sub>) formation,  
32 leading to suppose the possible role of O<sub>3</sub> in the effect of APAM. In this study, we produced an  
33 O<sub>3</sub>-dissolved medium (ODM) and comparatively analyzed its biological effect with APAM. Both  
34 agents had comparable amounts of dissolved O<sub>3</sub> (dO<sub>3</sub>), while APAM, but not ODM, contained  
35 nitrite and nitrate. Like APAM, ODM could induce apoptosis, nonapoptotic cell death, tubulin  
36 remodeling, MPMC, and nuclear shrinkage. Catalase mitigated all these events. The increases in

37 various intracellular and mitochondrial reactive oxygen species (ROS) and lipid peroxides  
38 proceeded to cell death, and catalase also prevented them. Conversely, suppressing cellular H<sub>2</sub>O<sub>2</sub>  
39 removal systems augmented mitochondrial ROS production and cell death. In contrast, like  
40 APAM, ODM minimally increased ROS production and MPMC in non-malignant cells. These  
41 results indicate that dO<sub>3</sub> is a critical mediator of the actions of APAM, including tumor-selective  
42 induction of MPMC and cell death. Our findings suggest ODM could be a more  
43 chemically-defined alternative to PTLs in cancer treatment.

## 44 **1. Introduction**

45 Like other intractable cancers, once developed, oral cancers (OCs) are highly refractory, recurrent,  
46 metastatic, resistant to anticancer agents and irradiation, and hard to remove by surgical  
47 resection [1,2]. Thus, improving prognosis through standard therapies remains challenging, and  
48 innovative treatment is urgently required. Cell death induction is one of the powerful strategies  
49 to eliminate cancers. Apoptosis is the representative mode of cancer cell death targeted by  
50 conventional therapies, including most anticancer agents and radiation. However, intractable  
51 cancers, including OCs, have congenital and acquired resistance. It is widely accepted that  
52 besides apoptosis, various nonapoptotic cell death forms contribute to cancer cell death [3].  
53 Consequently, drugs and tools targeting other forms of cell death could serve as successful  
54 venues for OC treatment.

55 Cold atmospheric plasmas (CAPs) are partially ionized gasses containing ions, electrons, and free  
56 radicals and have tumor-selective toxicity. Flushing CAPs to various solutions, such as culture  
57 media, buffers, and infusion fluids, result in plasma-treated liquids (PTLs), which also  
58 preferentially injure tumor cells while damaging non-malignant cells minimally [4–6]. CAPs and  
59 PALs also reduced tumor growth in animal models with minimal adverse events. Thus, CAP-based  
60 treatments have attracted much attention in cancer treatment. However, PTLs have different  
61 chemical and biological properties, depending on the physical nature of the plasmas generated,  
62 the solutions used, and various experimental parameters. In addition, the biological outcomes  
63 may also vary significantly depending on the target cell systems. As a result, their actions,  
64 including targeted cell death, are highly complicated; While most of them induce apoptosis,  
65 some of them can trigger nonapoptotic cell death forms, including autophagy [7,8], necroptosis  
66 [6], and ferroptosis [9] in various cancer cell models. Although numerous reports have shown the  
67 vital role of reactive oxygen and nitrogen species (ROS/RNS) in mediating the antitumor effect,  
68 the detailed mechanisms remain obscure. Moreover, PTLs have complicated components, and  
69 complete chemical identification of the active substances is challenging. Indeed, many kinds of  
70 chemical species, atomic oxygen (O), singlet oxygen (<sup>1</sup>O<sub>2</sub>), superoxide (O<sub>2</sub><sup>•-</sup>), hydroxyl radicals  
71 (<sup>•</sup>OH), hydrogen peroxide (H<sub>2</sub>O<sub>2</sub>), nitric oxide (NO<sup>•</sup>), and nitrogen oxide anions (NOx<sup>-</sup>), such as  
72 nitric dioxide (NO<sub>2</sub><sup>•</sup>), nitrite (NO<sub>2</sub><sup>-</sup>), and nitrate (NO<sub>3</sub><sup>-</sup>) have been proposed to participate in the  
73 effect. More complicatedly, the exact contents of these species vary considerably depending on  
74 the CAP source, settings, and ambient conditions. In addition, these oxidants can function  
75 cooperatively. Several studies have shown the synergistic effect of H<sub>2</sub>O<sub>2</sub> and NO<sub>2</sub><sup>-</sup> in cell death  
76 and tumor selectivity [10, 11]. Consequently, the primary mediator(s) and their molecular targets  
77 in the antitumor properties are poorly understood. Such chemical ambiguity heavily frustrates  
78 distinct descriptions of the mechanism of action and clinical application.

79 O<sub>3</sub> is the oxygen allotrope consisting of three oxygen atoms. It is an acrid gas at ordinary  
80 temperature and pressure. O<sub>3</sub> is an unstable molecule with unique physicochemical and

81 biological properties due to its resonance structures. It has the second-highest oxidizing power  
82 behind fluorine. O<sub>3</sub> directly injures the cell membrane of bacteria through the oxidation of  
83 phospholipids and lipoproteins and has potent antibacterial activity. O<sub>3</sub> also inactivates viruses,  
84 fungi, yeast, and protozoa. Therefore, it has been widely used for sterilization and disinfection. O<sub>3</sub>  
85 has also been utilized in treating various diseases for over a century [12]. Moreover, numerous in  
86 vitro and in vivo studies and a few clinical trials [13–15] have shown the anticancer effects of O<sub>3</sub>.  
87 O<sub>3</sub> has a direct antitumor effect in some cancers while having indirect effects, such as  
88 immunomodulation, synergistic or adjuvant effects with various anticancer drugs and radiation  
89 (cisplatin, 5-fluorouracil, etoposide, and gemcitabine) [16–18]. O<sub>3</sub> is administered to animals in  
90 various ways, including topical gas, rectal or intraperitoneal insufflation, and intravenous or  
91 intratumoral injection. O<sub>3</sub> has a substantial solubility in water (14 mmol/L at 20°C) and has also  
92 been used with nanotechnology as ozonated or ozonized water. However, it must be aware that  
93 pure O<sub>3</sub> production by conventional methods is challenging. The most widely used method to  
94 generate O<sub>3</sub> is the silent discharge in the air. However, this method results in the excitation of  
95 molecular nitrogen (N<sub>2</sub>) as well as molecular oxygen (O<sub>2</sub>), leading to the production of various  
96 nitrogen oxides (NO<sub>x</sub>). Accordingly, ozonated/ozonized fluids could contain a mixture of dO<sub>3</sub> and  
97 multiple bystander nitrogen oxide anions (NO<sub>x</sub><sup>-</sup>). NO<sub>x</sub>, such as nitric oxide (NO<sup>•</sup>) and nitric  
98 dioxide (NO<sub>2</sub><sup>•</sup>), can produce O<sub>3</sub> and more complicated, harmful oxidants in the presence of light.  
99 In addition, NO<sup>•</sup> has been recognized as a primary modulator of cell death and a potential target  
100 for anticancer therapy [19, 20]. As a result, the co-existence of bystander NO<sub>x</sub> could confuse the  
101 precise evaluation of the biological activity of dO<sub>3</sub> in these ozonated fluids. Therefore, eliminating  
102 NO<sub>x</sub> is essential to define the effect of dO<sub>3</sub> itself.

103 Mitochondria are highly plastic, dynamic, and heterogenous organelles in connection with these  
104 diverse functions. Their size, shape (macroscopic shape), and location vary in different tissues,  
105 cells, and experimental conditions. An emerging view is that mitochondrial shape and location  
106 changes are not passive events. Instead, they are active events coupled with cellular functions,  
107 cell death, and survival [21–23]. Mitochondria can distribute broadly throughout the cytoplasm  
108 (Pan-cytoplasmic), subplasmalemmal, or perinuclear sites. Pan-cytoplasmic distribution governs  
109 Ca<sup>2+</sup> transport from the endoplasmic reticulum (ER) via tethering with ER [24]. The  
110 subplasmalemmal distribution controls Ca<sup>2+</sup> channel activity by regulating mitochondrial  
111 function as a Ca<sup>2+</sup> reservoir [25]. The mitochondrial location around the perinuclear regions is  
112 called perinuclear mitochondrial clustering (PNMC). This response is induced by stresses, such as  
113 hypoxia and heat shock, and is associated with mitochondrial fragmentation [26, 27]. This type of  
114 positioning is thought to be adaptive to stresses and cytoprotective. Microtubule polymerization  
115 inhibitors, such as Nocodazole (NC) and Cholchicine, and the expression of KinAΔN355 mutant of  
116 Kinesin prevent it, indicating that microtubule- and Dynein and Kinesin-dependent. Mitochondria  
117 may be transported along the microtubule track. PNMC participates in cancer adaptation to  
118 hypoxia through mitochondrial reactive oxygen species (ROS) production and Hypoxia-inducible  
119 factor-1α, the master transcription factor of hypoxic signaling [26]. Recently, we reported another  
120 type of mitochondrial distribution associated with cancer cell death [28]. In this case,  
121 mitochondria become fragmented and gather one side of the perinuclear sites. Drastic changes  
122 in the shape and location of tubulin accompany this phenomenon. Like mitochondria, tubulin  
123 concentrates one side of the nuclei. NC and antioxidants prevent these changes, suggesting the  
124 involvement of similar mitochondrial transport mechanisms in PNMC and ROS. We named this  
125 unique mitochondrial positioning monopolar perinuclear mitochondrial clustering (MPMC) to  
126 distinguish it from other known mitochondrial locations.

127 We noticed that air plasma generation was accompanied by O<sub>3</sub> production. This notion led us to  
128 assume the possible role of the oxidant in the effect of APAM. To examine this hypothesis, we  
129 developed a new dO<sub>3</sub>-generating system to produce O<sub>3</sub> without exciting N<sub>2</sub> and dissolved it in a  
130 culture medium by bubbling. The resulting O<sub>3</sub>-dissolved medium (ODM) can keep dO<sub>3</sub> for a  
131 month at -80°C. In this study, we comparatively analyzed the biological effects between APAM  
132 and ODM. Results showed that without NO<sub>x</sub><sup>-</sup>, dO<sub>3</sub> could mimic various effects of APAM, including  
133 tumor-selective induction of MPMC and oxidative cell death.

## 134 **2. Materials and methods**

### 135 **2.1. Materials**

136 Unless otherwise specified, all chemicals were purchased from Sigma-Aldrich (St. Louis, MO, USA).  
137 The pan-caspase inhibitor Z-VAD-FMK was obtained from Merck Millipore (Darmstadt, Germany).  
138 All insoluble reagent was dissolved in dimethyl sulfoxide (DMSO), and the stock solution diluted  
139 in 10% Fetal Bovine Serum(FBS) contained Dulbecco's Modified Eagle Medium (DMEM; final  
140 DMSO concentration, <0.1%) before use.

### 141 **2.2. Cell culture**

142 The human OC cell line HOC-313 was kindly provided by the Department of Oral and  
143 Maxillofacial Surgery, Graduate School of Medical Science, Kanazawa University (Kanazawa,  
144 Japan). Another human OC cell line SAS and glioblastoma (GBM) cell line U251MG were obtained  
145 by the Japanese Collection of Research Bioresource (JCRB) Cell Bank of the National Institute of  
146 Biomedical Innovation, Health, and Nutrition (Osaka, Japan). Human fetal osteoblast hFOB was a  
147 kind gift from Dr. T. Ando (Yamanashi University). Human dermal fibroblasts (HDFs) were  
148 obtained from Cell Applications (San Diego, CA, USA). The cells were maintained in 10% FBS  
149 (Serena Europe GmbH, Brandenburg, Germany) containing DMEM (Merck, NM, USA)  
150 supplemented with 100 U/mL penicillin and 100 µg/mL streptomycin (FBS/DMEM) at 37 °C in a  
151 5% CO<sub>2</sub> incubator.

### 152 **2.3. O<sub>3</sub> and ODM preparations**

153 O<sub>3</sub> was generated in two different ways. Method A produced O<sub>3</sub> by irradiating an excimer light  
154 (185 nm) into the air using a UV-C lamp (Fig. 1A). This method allows specific excitation of O<sub>2</sub> but  
155 not molecular nitrogen (N<sub>2</sub>), the cause of NO<sub>x</sub> production. Method B made it by the silent  
156 discharge of highly pure (99.9%) O<sub>2</sub> (Taiyo Nippon Sanso JFP Corporation, Kanagawa, Japan)  
157 using the O<sub>3</sub> generator (Communication&Control Systems Company, Tokyo Keiki Incorporation,  
158 Tokyo, Japan) equipped with a dielectric barrier discharge probe illustrated in Fig. 1B. This closed  
159 system does not allow air contamination and the resulting excitation of N<sub>2</sub>. The generated O<sub>3</sub> was  
160 introduced into phenol red-free DMEM (Fuji Film Wako Chemicals, Osaka, Japan) by bubbling,  
161 resulting in an O<sub>3</sub>-dissolved medium (ODM). The typical experiment conditions are a 10–15 KV  
162 voltage and a gas flow rate of 0.4 L/min. ODM was made by O<sub>3</sub> bubbling at the ratio of 1 min  
163 bubbling/1 mL ODM. The original ODM was diluted to a final concentration of 6.3–50% with  
164 phenol red-free DMEM (biochemical experiments) or FBS/DMEM (for cell experiments).

### 165 **2.4. APAM preparation**

166 Air plasma and APAM were prepared as reported previously [28]. Briefly, the plasma was  
167 generated from the ambient air using a Piezobrush™ PZ2 model plasma jet (relyon, Germany)  
168 equipped with a piezo element. The APAM (1 mL) was made by flushing the plasma to phenol  
169 red-free DMEM for 1 min at a distance of 20 mm. The original APAM was diluted to a final  
170 concentration of 6.3–50% with the medium (biochemical experiments) or FBS/DMEM (for cell  
171 experiments).

## 172 **2.5. Quantitation of oxidants**

173 dO<sub>3</sub> concentration was measured by a polarographic O<sub>3</sub> meter (DOZ-1000PE, Custom  
174 Corporation, Tokyo, Japan). The concentration was also measured by a Digital Pack test  
175 (DPM2-O<sub>3</sub>, range 0.25~5 mg/L, Kyoritsu Chemical-Check Lab. Corp., Kanagawa, Japan). The  
176 concentrations of NO<sub>2</sub><sup>-</sup> and NO<sub>3</sub><sup>-</sup> were measured using a Kit (NO<sub>2</sub> / NO<sub>3</sub> Assay  
177 Kit-CII(Colorimetric) Griess Reagent Kit, Dojindo, Kumamoto, Japan) according to the  
178 manufacturer's protocols. The concentrations of NO<sub>2</sub><sup>-</sup> and NO<sub>3</sub><sup>-</sup> were calculated using a standard  
179 curve made using the authentic samples from the kit.

## 180 **2.6. Cell viability assay**

181 Cell viability was measured by the WST-8 assay using a Cell Count Reagent SF (Nacalai Tesque,  
182 Inc, Kyoto, Japan). Cells in FBS/DMEM were plated at 4 x 10<sup>3</sup> cells/well in 96-well plates (Corning  
183 Incorporated, NY, USA). They were incubated at 37 °C overnight, added with agents, and  
184 incubated for 72h. In the resistance assay, agents were added after incubating cells for 72 h. This  
185 prolonged preincubation allows cells to reach a higher density and become less sensitive to  
186 agents. After treatment, cells were added 10 µL Cell Count Reagent SF and further incubated for  
187 2h. Absorbances at 450 nm were measured by a Nivo 3F Multimode Plate Reader (PerkinElmer  
188 Japan Company, Ltd., Yokohama, Japan).

## 189 **2.7. Determination of cell death**

190 Cell death was evaluated by fluorescence microscopy as previously described [29] with minor  
191 modifications. Briefly, cells in FBS/DMEM were seeded at 1.5 x 10<sup>4</sup> cells/well in a 35 mm  
192 Poly-Lysine-coated glass bottom dish (D11531H, Matsunami Glass Ind. Corp., Osaka, Japan) and  
193 treated with agents at 37 °C overnight in a 5% CO<sub>2</sub> incubator. After removing the medium by  
194 aspiration, the cells were stained with 4 µM each of Calcein-AM and Ethidium bromide  
195 homodimer-1 (EthD-1) for 30min to label live and dead cells, respectively, using a kit (LIVE/DEAD  
196 Viability/Cytotoxicity kit) Cells were washed and immersed in FluoroBrite™ DMEM. Images were  
197 obtained using BZ-X 710 digital Biological Microscopy (Keyence, Osaka, Japan).

## 198 **2.8. Imaging of mitochondria and tubulin**

199 The mitochondrial morphology and positioning and tubulin were analyzed as previously  
200 described [28]. Briefly, cells FBS/DMEM were seeded at a 5 x 10<sup>4</sup>/mL density in a 35 mm  
201 Poly-Lysine-coated glass bottom dish, as described above, and treated with agents at 37 °C for 2  
202 or 18 h in a 5% CO<sub>2</sub> incubator. After removing the medium, the cells were stained with 20 nM  
203 MitoTracker™ Red CMXRos (MTR) or MitoTracker™ Green FM (MTG, ThermoFisher). The nuclei  
204 were counterstained with 1 mg/mL of Hoechst33342 for 1 h at 37 °C in a 5% CO<sub>2</sub> incubator.  
205 Tubulin was stained with Tubulin Trackerr™ Green (TTG, ThermoFisher). After washing with

206 FluoroBrite™, the cells were immersed in FluoroBrite™. Images were obtained using a BZ X-710  
207 Digital Biological Microscope (Keyence, Osaka, Japan) equipped with a 100 ×, 1.40 n.a.  
208 UPlanSApo Super-Apochromat, coverslip-corrected oil objective (Olympus, Tokyo, Japan) and  
209 analyzed using BZ-H3A application software (Keyence). For each experimental group, the  
210 mitochondria in 2 or 3 different pictures were counted for three different distribution patterns,  
211 pan-cytoplasmic (Type I), PNMC (Type II), and MPMC (Type III).

## 212 **2.9. Measurement of intracellular ROS generation**

213 As described above, cells were seeded in a 35 mm Poly-Lysine-coated glass bottom dish and  
214 treated with agents at 37 °C for 2 h in a 5% CO<sub>2</sub> incubator. After removing the medium, the cells  
215 were stained with 1 μM OxiORANGE™ (OXO), HYDROP™ (Hydrop, Goryo Chemicals, Sapporo,  
216 Japan), or 5 μM MitoSOX™ Red (MitoSOX, ThermoFisher) to detect ·OH, H<sub>2</sub>O<sub>2</sub>, and O<sub>2</sub><sup>·-</sup>,  
217 respectively. Images were obtained using BZ-X 710 digital Biological Microscopy fluorescence  
218 microscopy and analyzed using BZ-H3A application software as described above.

## 219 **2.10. Statistical analysis**

220 Data are presented as mean ± standard deviation (SD) and analyzed by a one-way analysis of  
221 variance followed by Tuckey's post hoc test using statistical software with Excel 2019 for windows  
222 (SSRI, Tokyo, Japan). P < 0.05 was considered statistically significant.

## 223 **3. Results**

### 224 **3.1. ODM and APAM have dO<sub>3</sub>**

225 Fig. 1A and B show the schematic diagrams of the generating systems for O<sub>3</sub> and dO<sub>3</sub>. O<sub>3</sub> was  
226 generated from the air using UV-C excimer light irradiation (Fig. 1A) or from highly pure O<sub>2</sub> using  
227 dielectric barrier discharge (Fig. 1B). The O<sub>3</sub> was introduced into a culture medium by bubbling,  
228 resulting in ODM. Next, we quantified the oxidants in ODM made by method B. As expected, the  
229 ODM contained substantial amounts of dO<sub>3</sub> (Fig. 1C). The quantity was increased over  
230 introducing time for at least 30 min. APAM had comparable levels of dO<sub>3</sub>. On the other hand,  
231 APAM contained about 100 μM of NO<sub>2</sub><sup>-</sup> and NO<sub>3</sub><sup>-</sup> while they were under detection limits in ODM  
232 (Fig. 1D). ODM made by method A also had dO<sub>3</sub> but not NO<sub>2</sub><sup>-</sup> and NO<sub>3</sub><sup>-</sup> (not shown).

### 233 **3.2. ODM can kill different tumor cells**

234 Next, we examined whether ODM affected tumor cell growth. Cells were treated with varying  
235 concentrations (12.5– 50% solution) of ODM for 72 h and analyzed for cell growth by WST-8  
236 assay. The treatment dose-dependently reduced the viability of OC cell lines, such as SAS and  
237 HOC-313 (Fig. 2A, B). ODM had a similar effect in several OS and GBM cell lines, including HOS  
238 (Fig. 2C, D). Cellular sensitivity to ODM varied considerably depending on the cellular growing  
239 status. In sensitive cells, ODM (≤12.5%) was enough to reduce their growth potently (≥50%  
240 reduction), while in insensitive cells, at higher concentrations (≥25%), it had a moderate effect  
241 (<50% reduction). Robust cell and nuclear morphological changes accompanied the growth  
242 suppression. Most untreated cells were adherent spindle cells. Treatment with ODM (50%) for 2 h  
243 resulted in blebbed, less adhesive round cells, most of which maintained membrane integrity (Fig.  
244 2E, F). At the same time, smooth surface round nuclei became smaller and deformed. These

245 results show that ODM can injure different cancer cell types. We further analyzed the effect of  
246 ODM using OC cells as a model.

### 247 **3.3. ODM primarily induces oxidative cell death in an H<sub>2</sub>O<sub>2</sub>-dependent manner**

248 APAM can induce apoptosis and nonapoptotic cell death in OC cells depending on the cell line  
249 and concentration [28]. Therefore, we examined whether ODM had similar effects. When ODM  
250 reduced cell viability potently, the broad-spectrum caspase inhibitor Z-VAD-FMK failed to  
251 suppress the effect in SAS cells (Fig. 3A). The necroptosis inhibitor Nec-1 did not affect the effect  
252 either. We obtained similar results in HOC-313 cells (Fig. 3B). In contrast, Z-VAD-FMK and Nec-1  
253 protected the cells from TRAIL cytotoxicity. The ferroptosis inhibitor Ferrostatin-1 (Fer-1) also  
254 failed to affect ODM cytotoxicity (Fig. 3A, B) while preventing Erastin cytotoxicity. On the other  
255 hand, when the effect of ODM was moderate, Z-VAD-FMK significantly suppressed it (Fig. 3C),  
256 indicating that apoptosis plays a role in specific cellular conditions. Regardless of the degree of  
257 the effect, the H<sub>2</sub>O<sub>2</sub>-degrading enzyme catalase protected both cells from ODM, while MnTBaP,  
258 the scavenger of O<sub>2</sub><sup>•-</sup> did not (Fig. 3C–E). Catalase also prevented APAM cytotoxicity (Fig. 3F).  
259 These results show that similar to APAM, ODM induces oxidative cell death in an  
260 H<sub>2</sub>O<sub>2</sub>-dependent manner.

### 261 **3.4. ODM increases mitochondrial oxidative stress in an H<sub>2</sub>O<sub>2</sub>-dependent manner**

262 APAM increases intracellular ROS, including those within mitochondria in OC cells [28]. Therefore,  
263 we determined whether ODM also could affect cellular ROS levels. First, we analyzed the  
264 intracellular O<sub>2</sub><sup>•-</sup> using the oxidant-specific probe MitoSOX Red (MitoSOX) in live cells. O<sub>2</sub><sup>•-</sup> was  
265 significantly increased in ODM-treated cells compared with untreated cells (Fig. 4A). The increase  
266 was observed before significant cellular and nuclear morphological changes. Moreover, catalase  
267 abolished the effect, indicating it is H<sub>2</sub>O<sub>2</sub>-dependent. Treatment with the irreversible catalase  
268 inhibitor 3-AT increased O<sub>2</sub><sup>•-</sup> (Fig. 4A), supporting the role of H<sub>2</sub>O<sub>2</sub>. Figure 4B shows the  
269 quantitative analysis of the increase and supports the view. In addition, the treatment increased  
270 <sup>•</sup>OH, detected by OXO, and catalase suppressed the effect, too (Fig. 4C). As MitoSOX and OXO  
271 can detect O<sub>2</sub><sup>•-</sup> and <sup>•</sup>OH, respectively, within mitochondria, the above results suggested the  
272 increases in mitochondrial ROS (mROS). To further test this view, we analyzed the cellular location  
273 of <sup>•</sup>OH. In untreated cells, the oxidant has broadly distributed the cytoplasm. After ODM  
274 treatment, the oxidant was seen at one side of the perinuclear sites. As a result, it colocalized with  
275 mitochondria, and catalase abolished the changes (Fig. 4D). These results show that ODM  
276 increases mitochondrial oxidative stress in an H<sub>2</sub>O<sub>2</sub>-dependent manner.

### 277 **3.5. Reduced H<sub>2</sub>O<sub>2</sub> removal augments ODM-induced H<sub>2</sub>O<sub>2</sub> increase and cell death in 278 tolerant cells**

279 We noticed that the effect of ODM decreased as cell density increased. As a result, HOC-313 cells  
280 grown at a high density became highly resistant to treatment with ODM (50%) (Fig. 5A). As the  
281 above results suggested that H<sub>2</sub>O<sub>2</sub> was critical in oxidative cell death, we assumed the resistance  
282 might be related to H<sub>2</sub>O<sub>2</sub>-scavenging activity. To test this hypothesis, we examined the impact of  
283 agents affecting the activity on ODM cytotoxicity. The glutathione (GSH) synthase inhibitor BSO  
284 has been shown to reduce GSH synthesis and GSH-dependent antioxidant systems, including  
285 GSH peroxidase (GPX), the primary H<sub>2</sub>O<sub>2</sub>-scavenging enzyme [30, 31]. On the other hand, 3-AT,  
286 an irreversible catalase inhibitor, can block H<sub>2</sub>O<sub>2</sub> removal by catalase. BSO had moderate

287 cytotoxicity and markedly augmented growth inhibition and cell death caused by ODM (Fig. 5A,  
288 B). BSO also synergistically increased intracellular H<sub>2</sub>O<sub>2</sub> with ODM (Fig. 5C). 3-AT also augmented  
289 the growth inhibitory effect to a lesser extent. These results suggest that the resistance to ODM  
290 may be due to increased H<sub>2</sub>O<sub>2</sub> removal.

### 291 **3.6. ODM induces MPMC and microtubule remodeling in an H<sub>2</sub>O<sub>2</sub>-dependent manner**

292 In untreated cells, most mitochondria belong to Type I or II. Following ODM treatment, they  
293 became Type III (Fig. 6A). These morphological changes occurred as rapidly as within 2 h after  
294 ODM treatment. Like ODM cytotoxicity, catalase prevented the effect. Quantitative analyses of  
295 Type I, II, and III mitochondria ratios confirmed these observations (Fig. 6B). Similar  
296 morphological changes were observed in SAS, HOS, and U251MG (Supplementary Fig. S1A–C).  
297 The above results suggested the onset of mitochondrial movement before the distribution  
298 change. Since mitochondria can move along the microtubule track, we analyzed the impact of  
299 ODM on tubulin dynamics. In untreated cells, tubulin had a network structure distributing  
300 broadly on both sides of the nuclei in the cytoplasm (Pan-cytoplasmic) (Fig. 6C). On the other  
301 hand, after ODM treatment, it condensed and assembled one side of the nuclei (Perinuclear).  
302 Catalase also prevented the effect (Fig. 6C). Similarly, the microtubule inhibitor Nocodazole (NC)  
303 prevented MPMC and the distribution shift (Supplementary Fig. S1D). These results show that  
304 ODM induces MPMC and microtubule remodeling in an H<sub>2</sub>O<sub>2</sub>-dependent manner.

### 305 **3.7. ODM causes minimal MPMC, ROS production, and cell death in non-malignant cells**

306 Next, we examined whether ODM had cytotoxicity in non-malignant cells. ODM (<25%) had  
307 minimal effect on the viability of HaCaT and hFOB, the non-transformed counterparts of OC and  
308 OS, respectively (Fig. 7A, B). Similar results were obtained in HDFs (not shown). At a higher  
309 concentration (50%), ODM decreased cell viability moderately (around 50%). Moreover, minimal  
310 cell and nuclear morphological changes were observed after ODM treatment in HaCaT and HDFs  
311 (Fig. 7C, D). ODM had a minimal effect on mitochondrial morphology in HaCaT while increasing  
312 mitochondrial fragmentation but evoked MPMC minimally in HDFs (Fig. 7C, D). In addition, ODM  
313 minimally increased intracellular H<sub>2</sub>O<sub>2</sub> and <sup>•</sup>OH in HaCaT cells (Supplementary Fig. S2). These  
314 results indicate that ODM causes minimal MPMC, ROS production, and cell death in  
315 non-malignant cells.

## 316 **4. Discussion**

317 The present study aimed to examine the antitumor activity of dO<sub>3</sub> and verify its role in mediating  
318 the action of APAM. As expected, ODM had considerable amounts of O<sub>3</sub> (Fig. 1) and potent  
319 cytotoxicity in various cancer cells, including OC, OS, and GBM (Fig. 2). Moreover, it primarily  
320 triggered oxidative cell death in OC cells. Meanwhile, apoptosis explicitly participated in the  
321 moderate effect (Fig. 3). Thus, apoptosis induction may occur under limited conditions and may  
322 be insufficient for killing OC cells effectively. Oxidative cell death may be essential for efficient OC  
323 killing. In line with the role of oxidative stress, ODM increased mitochondrial ROS, such as O<sub>2</sub><sup>•-</sup>  
324 and <sup>•</sup>OH (Fig. 4). catalase prevented the increases while reduced H<sub>2</sub>O<sub>2</sub>-removal upregulated them  
325 (Fig. 4 and 5). These findings indicate that H<sub>2</sub>O<sub>2</sub> mediates oxidative stress. These results are  
326 similar to those obtained with APAM previously described [28]. Moreover, APAM had dO<sub>3</sub> as  
327 much as ODM (Fig. 1). APAM has potent antitumor activity against different cancer cell lines.  
328 More importantly, it acts on cancer cells preferentially [28]. Notably, our data indicate that ODM



329 has similar tumor-selective action. ODM showed little cytotoxicity against non-malignant cells  
330 and minimally increased MPMC and ROS production (Fig. 7). Our results indicate that dO<sub>3</sub> has  
331 tumor-selective cytotoxicity and support the view that dO<sub>3</sub> mediates the action of APAM. In  
332 addition, ODM had NO<sub>2</sub><sup>-</sup> and NO<sub>3</sub><sup>-</sup> below the detection limit (Fig. 1), indicating that the effect is  
333 independent of NO<sub>x</sub>.

334 It is known that dO<sub>3</sub> can directly generate H<sub>2</sub>O<sub>2</sub> in the reaction with H<sub>2</sub>O. Our previous study  
335 demonstrated that H<sub>2</sub>O<sub>2</sub> increased mitochondrial O<sub>2</sub><sup>•-</sup> via the reduction of the electron transport  
336 chain in different cancer cells [32]. In addition, H<sub>2</sub>O<sub>2</sub> also can generate <sup>•</sup>OH in reacting with iron  
337 (II) or copper (I). Collectively, H<sub>2</sub>O<sub>2</sub> produced from dO<sub>3</sub> can trigger mitochondrial oxidative stress.  
338 Another finding that GSH synthesis inhibition sensitized tolerant cells to ODM (Fig. 5) supports  
339 this view. These observations suggest that the GSH-dependent H<sub>2</sub>O<sub>2</sub>-removal mechanism,  
340 possibly GPXs, is vital in removing H<sub>2</sub>O<sub>2</sub> after dO<sub>3</sub> treatment. The inhibition of catalase activity by  
341 3-AT increased mitochondrial ROS but minimally affected cell survival (Fig. 4 and 5), suggesting  
342 the requirement of another event to cause cell death in tolerant cells. Ferroptosis has emerged as  
343 a critical oxidative cell death mode in cancer cells. It is regulated necrosis resulting from LPO  
344 accumulation where GPX and iron are crucial (for a recent review, see [33]). ODM could increase  
345 <sup>•</sup>OH, the initiator of lipid peroxidation (Fig. 4). In addition, preliminary results showed that iron  
346 chelation partially prevented the effect, while iron (II) addition augmented it. Therefore, <sup>•</sup>OH  
347 generation from H<sub>2</sub>O<sub>2</sub> and iron (II) via the Fenton reaction might play a role in the production.  
348 This view favors the notion that besides H<sub>2</sub>O<sub>2</sub>, other factors are essential for sufficient cell death.  
349 Our data indicate similarities and differences between cell death caused by ODM and ferroptosis.  
350 The possible involvement of GPX4 resembles ferroptosis. On the other hand, the failure of Fer-1  
351 in protecting cells from ODM (Fig. 3) suggests the role of different mechanisms and lipid radicals.  
352 Further characterization, including the role of several master ferroptosis regulators and genes, is  
353 underway.

354 Our results showed that similar to APAM [28], ODM could cause MPMC and tubulin remodeling  
355 (Fig. 6). The findings provide evidence for the role of dO<sub>3</sub> in the action of APAM. Notably, catalase  
356 blocked these two events, indicating the critical role of H<sub>2</sub>O<sub>2</sub> in regulating MPMC and tubulin  
357 remodeling. MPMC may involve multiple sequential cellular events, mitochondrial fragmentation,  
358 movement, and assembly. In line with the role of H<sub>2</sub>O<sub>2</sub>, we previously demonstrated that H<sub>2</sub>O<sub>2</sub>  
359 could cause mitochondrial fragmentation in MM cells via increased mitochondrial O<sub>2</sub><sup>•-</sup> [34] (Saito  
360 et al., 2016). This event was associated with increased phosphorylation of Drp1 at Ser 616, the  
361 driving signal of mitochondrial fission. Similar mechanisms might be involved in the effect of  
362 ODM. Tubulin polymerization is critical in altered mitochondrial distribution from Type I to Type II  
363 in response to stresses, such as hypoxia and heat shock [26, 27]. This event is required for the  
364 mitochondrial movement along the microtubule track by motor proteins such as Kinesin and  
365 Dynein. Our data indicate that catalase (Fig. 6) and NC (Supplementary Fig. S1D) can prevent  
366 tubulin remodeling and MPMC caused by ODM, suggesting the involvement of H<sub>2</sub>O<sub>2</sub> and tubulin  
367 polymerization in the mitochondrial movement. Besides mitochondrial oxidative stress, plasma  
368 membrane depolarization (PMD) is essential for mitochondrial assembly [35]. Notably, dO<sub>3</sub> can  
369 affect biological systems in several different forms. It can react with target biomaterials directly  
370 and specifically as O<sub>3</sub> itself. It can also attack poly unsaturated fatty acids (PUFAs) in the cell  
371 membrane, resulting in lipid oxides. The production follows PUFA peroxidation and the  
372 production of other toxic radicals and substances, such as LO<sup>•</sup>, LOO<sup>•</sup>, lipo hydroperoxides (LOOH),  
373 4-hydroxy-2,3 trans-noneal (HNE), and malonyl dialdehyde (MDA) [13]. These radicals and

374 aldehydes are toxic and could contribute to ODM cytotoxicity. Notably, linoleic acid  
375 hydroperoxide can evoke the depolarization of plasma membrane and mitochondrial membrane  
376 potentials [36]. Therefore, LPOs like lipid hydroperoxides might trigger PMD and mitochondrial  
377 assembly. Further studies to explore this possibility are ongoing.

378 Several prior studies have implicated the role of O<sub>3</sub> in the antitumor effect of PTLs. Mokhtari and  
379 colleagues [37] have shown the production of O<sub>3</sub> in plasma-activated media and the correlation  
380 between the amount and antitumor activity. However, this report lacks evidence for the oxidant's  
381 role in the media's action. Lunov et al. [38, 39] have demonstrated that O<sub>3</sub> is an abundant  
382 component of air plasma and that O<sub>3</sub> gas flush induces necrosis. Their findings are similar to the  
383 present findings, while there are some discrepancies between our results and theirs. The authors  
384 reported the highest toxicity of O<sub>3</sub> gas for non-malignant cells. In contrast, dO<sub>3</sub> had little toxicity  
385 in the present study (Fig. 7). The report also demonstrated that O<sub>3</sub> gas caused mitochondrial  
386 permeability transition. However, our preliminary results showed that dO<sub>3</sub> had no such effect. A  
387 possible explanation for the discrepancies may be the different biological effects between O<sub>3</sub> gas  
388 and dO<sub>3</sub>. As described above, dO<sub>3</sub> can exhibit its physical impacts by acting in various forms  
389 other than O<sub>3</sub>.

390 In summary, this study shows that dO<sub>3</sub> has tumor-selective cytotoxicity primarily via oxidative cell  
391 death independently of NO<sub>x</sub>. Our results suggest that mitochondrial ROS and the resulting  
392 tubulin remodeling and MPMC play a vital role in the action. Also, our data support the view that  
393 dO<sub>3</sub> is a critical mediator of the action of APAM. Thus, ODM could be a more chemically-defined  
394 alternative to PTLs in cancer treatment.

## 395 **Figure legends**

396 **Figure 1. ODM has dO<sub>3</sub> but not NO<sub>2</sub><sup>-</sup>/NO<sub>3</sub><sup>-</sup>.** (A, B) Schematic O<sub>3</sub>-generator and bubbling system  
397 diagrams. In method A, O<sub>3</sub> was produced by irradiating an excimer light (185 nm) into the air  
398 using a UV-C lamp (A). In method B, O<sub>3</sub> was generated by exciting high-purity (99.9%) molecular  
399 oxygen (O<sub>2</sub>) with dielectric barrier discharge (B). The resulting O<sub>3</sub> was then introduced into a  
400 DMEM by bubbling. (C) Quantitation of dissolved O<sub>3</sub> (dO<sub>3</sub>) in ODM and APAM. The amount of  
401 dO<sub>3</sub> in ODM and APAM (12.5–50% solution) was measured as described in Materials. Data are the  
402 mean ± SD (n=4). (D) The concentrations of NO<sub>2</sub><sup>-</sup> and NO<sub>3</sub><sup>-</sup> (C) in ODM (6.3–50% solution) were  
403 measured using the Griess method. APAM was used as a positive control. NO<sub>3</sub><sup>-</sup> concentration was  
404 calculated following the formula; [NO<sub>3</sub><sup>-</sup>] = [(NO<sub>2</sub><sup>-</sup> + NO<sub>3</sub><sup>-</sup>)] - [NO<sub>2</sub><sup>-</sup>]. Data are the mean ± SD  
405 (n=4).

406 **Figure 2. ODM can injure different cancer cell lines.** (A–D) SAS (A), HOC-313 (B), HOS (C), and  
407 U251MG (D) cells in FBS/DMEM were plated at 4 × 10<sup>3</sup> cells/well and incubated overnight. The  
408 cells were treated with ODM (12.5–50% solution) for 72 h and analyzed for growth using a WST-8  
409 cell growth assay. Data are the mean ± SD (n =8). Data were analyzed by one-way analysis of  
410 variance followed by Tukey's post hoc test. \*\*P < 0.01; \*\*\*P < 0.001; NS, not significant vs. control  
411 treated with vehicle. (E, F) SAS (E) and HOS (F) cells (1.5×10<sup>4</sup> cells/well) cells/well were plated in a  
412 35 mm glass bottom dish and incubated overnight, and then treated with ODM (50%) for 2 h.  
413 After removing the medium by aspiration, the cells were stained with Hoechst33342 (Hoe).  
414 Images were obtained from BZ-X 710 Digital Biological Microscope equipped with a 100x  
415 objective and analyzed using BZ-H3A application software. PC, phase contrast. Bar = 10 μm.

416 **Figure 3. ODM induces oxidative cell death in an H<sub>2</sub>O<sub>2</sub>-dependent manner.** (A, B) Effect of  
417 cell death inhibitors on ODM cytotoxicity. SAS (A) and HOC-313 (B) cells were processed as  
418 described in the legend of Figure 2. The cells were incubated with 10 μM Z-VAD-FMK,  
419 Ferostatin-1 (Fer-1), or 30 μM Necrostatin-1 (Nec-1) for 1 h and then treated with ODM (50%) for  
420 72 h. The cell growth was measured as described in the legend of Figure 2. (C) HOC-313 cells  
421 were incubated with 10 μM Z-VAD-FMK or 10 U/ml catalase for 1 h and then treated with ODM  
422 (50%) for 72 h. The cell growth was measured as described in the legend of Figure 2. Data are the  
423 mean ± SD (n = 8). Data were analyzed by one-way analysis of variance followed by Tukey's post  
424 hoc test. \*\*\**P* < 0.001 vs. control treated with vehicle. ### *P* < 0.001. (D, E) SAS (D) and HOC-313  
425 (E) cells were incubated with 10 U/ml catalase or 30 μM MnTBaP for 1 h and then treated with  
426 ODM (50%) for 72 h. (F) SAS cells were incubated with 10 U/ml catalase for 1 h and then treated  
427 with APAM (25, 50%) for 72 h. The cell growth was measured as described in the legend of Figure  
428 2. Data are the mean ± SD (n = 8). Data were analyzed by one-way analysis of variance followed  
429 by Tukey's post hoc test. \*\*\**P* < 0.001 vs. control treated with vehicle. ### *P* < 0.001.

430 **Figure 4. ODM increases different intracellular ROS in an H<sub>2</sub>O<sub>2</sub>-dependent manner.** (A)  
431 HOC-313 cells were preincubated with 3-amino-1,2,4-triazole (3-AT, 1 mM) and catalase for 1h  
432 and then treated with ODM (50%) for 2h. Mitochondrial reactive oxygen species (ROS) and nuclei  
433 were stained using specific probes MitoSOX and Hoechst33342, respectively. All images were  
434 obtained from BZ-X 710 Digital Biological Microscope with a uniform exposure time (1/2.5S). (B)  
435 The luminescence of all color images was measured using a public-domain Java NIH ImageJ  
436 program. Data are the mean ± SD (n=9). Data were analyzed by own-way analysis of variance  
437 followed by Tuckey's post hoc test. ####*P* < 0.001. (C) The cells were pretreated with catalase for  
438 1h and then incubated with ODM for 2h. Intracellular hydroxyl radicals were stained with OXO.  
439 The nuclei were counterstained with Hoechst33342. The luminescence of all color images was  
440 analyzed as described above. Data are the mean ± SD (n=8). Data were analyzed by own-way  
441 analysis of variance followed by Tuckey's post hoc test.\*\*\**P* < 0.001 vs. control. ####*P* < 0.001. Bar  
442 = 300 μm. (D) HOC-313 cells were pretreated with catalase for 1h and then incubated with ODM  
443 for 2h. Mitochondria, intracellular hydroxyl radicals, and nuclei were stained with MTG, OXO, and  
444 Hoechst33342. Bar = 20 μm.

445 **Figure 5. BSO augments ODM-induced H<sub>2</sub>O<sub>2</sub> increase and cell death in insensitive cells.** (A)  
446 HOC-313 cells were pretreated with the DL-Buthionine-(S, R)-sulfoximine (BSO, 100 μM) or 3-AT  
447 (1 mM) alone or in combination for 1h. then they were treated with the ODM (50%) for 72h. Cells  
448 were analyzed for viability as described in the legend of Figure 3. Data were analyzed by  
449 own-way analysis of variance followed by Tuckey's post hoc test. Data are the mean ± SD (n=7 or  
450 8). \*\**P* < 0.01; NS, not significant vs. control; ####*P* < 0.001. (B) The cells were pretreated with BSO  
451 for 1h and then treated with ODM (50%). They were incubated for 18h and analyzed for cell  
452 death using Calcein-AM (Calcein, 2 μM) and ethidium bromide-1 (EthD-1, 2 μM). Live cells were  
453 stained green with Calcein, whereas dead/dying cells were stained red with EthD-1. Images were  
454 obtained from BZ-X 710 Digital Biological Microscope with a 4x objective. Bar = 300 μm. (C) The  
455 cells were treated with the ODM (50%) or BSO alone or in combination for 18h and were stained  
456 with HYDROP™ (Hydrop,1μM). Images were obtained from BZ-X 710 Digital Biological  
457 Microscope with a 40x objective and analyzed as previously described in the legend of Figure 4.  
458 Bar = 20 μm.

459 **Figure 6. ODM induces MPMC and tubulin remodeling in an H<sub>2</sub>O<sub>2</sub>-dependent manner.** (A)  
460 After treating HOC-313 cells with medium or ODM (50 %) for 2h, mitochondria and nuclei were

461 stained with 20 nM MTR and Hoechst33342, respectively. Images were obtained from BZ-X 710  
462 Digital Biological Microscope with a 100x objective and analyzed using BZ-H3A application  
463 software. Bar =10  $\mu$ m. (B) Mitochondria exhibiting three different subcellular distributions,  
464 Pan-cytoplasmic (Type I), PNMC (Type II), and MPMC (Type III), were counted in two or three  
465 pictures. Data are the mean  $\pm$  SD (n= $\sim$ 20). (C) The cells were treated with ODM (50%) for 2h and  
466 stained with Tubulin Tracker™ Green (TTG, 100 nM) for 30 min. Bar =10  $\mu$ m. (D) Tubulin exhibiting  
467 Pan-cytoplasmic or Perinuclear distribution was counted in two or three pictures. Data are the  
468 mean  $\pm$  SD (n= $\sim$ 20).

469 **Figure 7. ODM has low cytotoxicity in non-malignant cells.** (A, B) HaCaT (A) and hFOB (C)  
470 cells were treated with ODM at the indicated concentration for 72h and were measured for  
471 viability by a WST-8 assay. Data were analyzed by own-way analysis of variance followed by  
472 Tuckey's post hoc test. **\*\*P** < 0.01; NS, not significant vs. control. (C, D) HaCaT (C) and HDFs (D)  
473 were treated with ODM (50%) for 2h. After stimulation, cells were stained with MTR and  
474 Hoechst33342. Images were obtained and analyzed as described in the legend of Figure 6. Bar  
475 =10  $\mu$ m. Mitochondria exhibiting three different subcellular distributions (Type I, Type II, Type III)  
476 were counted in two or three pictures. Data are the mean  $\pm$  SD (n= $\sim$ 20).

#### 477 **Supplementary Figure legends**

478 **Figure S1. ODM induces MPMC and tubulin remodeling in different tumor cells via**  
479 **microtubules.** (A–C) SAS (A), HOS (B), and U251MG cells (C) were treated with medium or ODM  
480 (50 %) for 2h, and mitochondria and nuclei were stained with 20 nM MTR and Hoechst33342,  
481 respectively. Images were obtained from BZ-X 710 Digital Biological Microscope with a 100x  
482 objective and analyzed. Bar =10  $\mu$ m. (D) HOC-313 cells were treated with ODM (50%) for 2h and  
483 stained with MTR, TTG, and Hoechst33342. Images were taken and analyzed as described in the  
484 legend of Figure 6. Bar =10  $\mu$ m.

485 **Figure S2. ODM minimally increases intracellular ROS in non-malignant cells.** HaCaT cells  
486 were treated with ODM (50%) for 2h. After stimulation, H<sub>2</sub>O<sub>2</sub> and hydroxyl radicals were stained  
487 with HYDROP™ (Hydrop,1 $\mu$ M) and OxiORANGE (OXO, 1  $\mu$ M), respectively. The nuclei were  
488 stained with Hoechst33342. Images were obtained from BZ-X 710 Digital Biological Microscope  
489 with a 40x objective and analyzed as described above. Bar = 20  $\mu$ m.

#### 490 **Acknowledgments**

491 We thank the JCRB Cell Bank of the National Institutes of Biomedical Innovation, Health, and  
492 Nutrition (Osaka, Japan) and the Riken BioResource Center (Tsukuba, Japan) for providing cell  
493 lines.

494 **CrediT authorship contribution statement:** Conceptualization, Y. S.-K., M. S.-K. (Manami  
495 Suzuki-Karasaki), S.I. H.O. investigation, M. S.-K. (Manami Suzuki-Karasaki), M. S.-K. (Miki  
496 Suzuki-Karasaki), Y.O., S.I., H.O. Data acquisition and analysis, M. S.-K. (Manami Suzuki-Karasaki),  
497 M. S.-K. (Miki Suzuki-Karasaki), Y.O., S.I., H.O. Funding acquisition, Y. S.-K., M. S.-K. (Manami  
498 Suzuki-Karasaki). Methodology, S.I., H.O. Visualization, Y. S.-K., M. S.-K. (Manami Suzuki-Karasaki).  
499 Project administration, Y. S.-K., S.I., H.O. Resources, S.I., H.O., H.N. writing–original draft  
500 preparation, Y. S.-K., M. S.-K. (Manami Suzuki-Karasaki). writing–review and editing, Y. S.-K., M.  
501 S.-K. (Manami Suzuki-Karasaki), H.N. supervision, Y. S.-K., H.N.

502 **Declaration of competing interest**

503 Manami Suzuki-Karasaki, Miki Suzuki-Karasaki, and Dr. Yoshihiro Suzuki-Karasaki are employees  
504 of the Non-Profit Research Institute Plasma ChemiBio Laboratory. Other authors have no conflicts  
505 of interest. The funders had no role in the study's design, in the collection, analyses, or  
506 interpretation of data, in the writing of the manuscript, or in the decision to publish the results.

507 **Funding**

508 This work was partly supported by JSPS KAKENHI, Grant Numbers JP21K0927, and JP21K10128.

509 **References**

- 510 1. Karunakaran K, Muniyan R. Genetic alterations and clinical dimensions of oral cancer: a review.  
511 *Mol Biol Rep.* 2020;47(11):9135-48.
- 512 2. Sha J, Bai Y, Ngo HX, Okui T, Kanno T. Overview of Evidence-Based Chemotherapy for Oral  
513 Cancer: Focus on Drug Resistance Related to the Epithelial-Mesenchymal Transition.  
514 *Biomolecules.* 2021;11(6).
- 515 3. Kornienko A, Mathieu V, Rastogi SK, Lefranc F, Kiss R. Therapeutic agents triggering  
516 nonapoptotic cancer cell death. *J Med Chem.* 2013;56(12):4823-39.
- 517 4. Keidar M, Walk R, Shashurin A, Srinivasan P, Sandler A, Dasgupta S, et al. Cold plasma  
518 selectivity and the possibility of a paradigm shift in cancer therapy. *Br J Cancer.*
- 519 5. Yan D, Sherman JH, Keidar M. Cold atmospheric plasma, a novel promising anticancer  
520 treatment modality. *Oncotarget.* 2017;8(9):15977-95.
- 521 6. Ando T, Suzuki-Karasaki M, Ichikawa J, Ochiai T, Yoshida Y, Haro H, et al. Combined Anticancer  
522 Effect of Plasma-Activated Infusion and Salinomycin by Targeting Autophagy and  
523 Mitochondrial Morphology. *Front Oncol.* 2021;11:593127.
- 524 7. Ito T, Ando T, Suzuki-Karasaki M, Tokunaga T, Yoshida Y, Ochiai T, et al. Cold PSM, but not TRAIL,  
525 triggers autophagic cell death: A therapeutic advantage of PSM over TRAIL. *Int J Oncol.*  
526 2018;53(2):503-14.
- 527 8. Yoshikawa N, Liu W, Nakamura K, Yoshida K, Ikeda Y, Tanaka H, et al. Plasma-activated medium  
528 promotes autophagic cell death along with alteration of the mTOR pathway. *Sci Rep.*  
529 2020;10(1):1614.
- 530 9. Jo A, Bae JH, Yoon YJ, Chung TH, Lee EW, Kim YH, et al. Plasma-activated medium induces  
531 ferroptosis by depleting FSP1 in human lung cancer cells. *Cell Death Dis.* 2022;13(3):212.
- 532 10. Girard PM, Arbabian A, Fleury M, Bauville G, Puech V, Dutreix M, et al. Synergistic Effect of  
533 H2O2 and NO2 in Cell Death Induced by Cold Atmospheric He Plasma. *Sci Rep.* 2016;6:29098.

- 534 11. Bauer G. The synergistic effect between hydrogen peroxide and nitrite, two long-lived  
535 molecular species from cold atmospheric plasma, triggers tumor cells to induce their cell  
536 death. *Redox Biol.* 2019;26:101291.
- 537 12. Baeza-Noci J, Pinto-Bonilla R. Systemic Review: Ozone: A Potential New Chemotherapy. *Int J*  
538 *Mol Sci.* 2021;22(21).
- 539 13. Bocci VA. Scientific and medical aspects of ozone therapy. State of the art. *Arch Med Res.*  
540 2006;37(4):425-35.
- 541 14. Bocci V, Travagli V, Zanardi I. Randomised, double-blinded, placebo-controlled, clinical trial of  
542 ozone therapy as treatment of sudden sensorineural hearing loss. *J Laryngol Otol.*  
543 2009;123(7):820; author reply
- 544 15. Clavo B, Santana-Rodríguez N, Llontop P, Gutiérrez D, Suárez G, López L, et al. Ozone Therapy  
545 as Adjuvant for Cancer Treatment: Is Further Research Warranted? *Evid Based Complement*  
546 *Alternat Med.* 2018;2018:7931849.
- 547 16. Zänker KS, Kroczek R. In vitro synergistic activity of 5-fluorouracil with low-dose ozone  
548 against a chemoresistant tumor cell line and fresh human tumor cells. *Chemotherapy.*  
549 1990;36(2):147-54.
- 550 17. Cannizzaro A, Verga Falzacappa CV, Martinelli M, Misiti S, Brunetti E, Bucci B. O<sub>2</sub>/O<sub>3</sub> exposure  
551 inhibits cell progression affecting cyclin B1/cdk1 activity in SK-N-SH while induces apoptosis  
552 in SK-N-DZ neuroblastoma cells. *J Cell Physiol.* 2007;213(1):115-25.
- 553 18. Simonetti V, Quagliariello V, Giustetto P, Franzini M, Iaffaioli RV. Association of Ozone with  
554 5-Fluorouracil and Cisplatin in Regulation of Human Colon Cancer Cell Viability: In Vitro  
555 Anti-Inflammatory Properties of Ozone in Colon Cancer Cells Exposed to Lipopolysaccharides.  
556 *Evid Based Complement Alternat Med.* 2017;2017:7414083.
- 557 19. Kamm A, Przychodzen P, Kuban-Jankowska A, Jacewicz D, Dabrowska AM, Nussberger S, et al.  
558 Nitric oxide and its derivatives in the cancer battlefield. *Nitric Oxide.* 2019;93:102-14.
- 559 20. Kim J, Thomas SN. Opportunities for Nitric Oxide in Potentiating Cancer Immunotherapy.  
560 *Pharmacol Rev.* 2022;74(4):1146-75.
- 561 21. Twig G, Shirihai OS. The interplay between mitochondrial dynamics and mitophagy. *Antioxid*  
562 *Redox Signal.* 2011;14(10):1939-51.
- 563 22. Hoppins S, Nunnari J. *Cell Biology.* Mitochondrial dynamics and apoptosis--the ER connection.  
564 *Science.* 2012;337(6098):1052-4.
- 565 23. Pendin D, Filadi R, Pizzo P. The Concerted Action of Mitochondrial Dynamics and Positioning:  
566 New Characters in Cancer Onset and Progression. *Front Oncol.* 2017;7:102.
- 567 24. Pedriali G, Rimessi A, Sbanò L, Giorgi C, Wieckowski MR, Previati M, et al. Regulation of  
568 Endoplasmic Reticulum-Mitochondria Ca. *Front Oncol.* 2017;7:180.

- 569 25. Quintana A, Schwarz EC, Schwindling C, Lipp P, Kaestner L, Hoth M. Sustained activity of  
570 calcium release-activated calcium channels requires translocation of mitochondria to the  
571 plasma membrane. *J Biol Chem*. 2006;281(52):40302-9.
- 572 26. Al-Mehdi AB, Pastukh VM, Swiger BM, Reed DJ, Patel MR, Bardwell GC, et al. Perinuclear  
573 mitochondrial clustering creates an oxidant-rich nuclear domain required for hypoxia-induced  
574 transcription. *Sci Signal*. 2012;5(231):ra47.
- 575 27. Agarwal S, Ganesh S. Perinuclear mitochondrial clustering, increased ROS levels, and HIF1 are  
576 required for the activation of HSF1 by heat stress. *J Cell Sci*. 2020;133(13).
- 577 28. Suzuki-Karasaki M, Ando T, Ochiai Y, Kawahara K, Nakayama H, Suzuki-Karasaki Y. Air  
578 Plasma-Activated Medium Evokes a Death-Associated Perinuclear Mitochondrial Clustering.  
579 *Int J Mol Sci*. 2022;23(3).
- 580 29. Suzuki Y, Inoue T, Murai M, Suzuki-Karasaki M, Ochiai T, Ra C. Depolarization potentiates  
581 TRAIL-induced apoptosis in human melanoma cells: role for ATP-sensitive K<sup>+</sup> channels and  
582 endoplasmic reticulum stress. *Int J Oncol*. 2012;41(2):465-75.
- 583 30. Meister A. Mitochondrial changes associated with glutathione deficiency. *Biochim Biophys*  
584 *Acta*. 1995;1271(1):35-42.
- 585 31. Jiang H, Wang H, De Ridder M. Targeting antioxidant enzymes as a radiosensitizing strategy.  
586 *Cancer Lett*. 2018;438:154-64.
- 587 32. Inoue T, Suzuki-Karasaki Y. Mitochondrial superoxide mediates mitochondrial and  
588 endoplasmic reticulum dysfunctions in TRAIL-induced apoptosis in Jurkat cells. *Free Radic Biol*  
589 *Med*. 2013;61:273-84.
- 590 33. Stockwell BR. Ferroptosis turns 10: Emerging mechanisms, physiological functions, and  
591 therapeutic applications. *Cell*. 2022;185(14):2401-21.34. Saito K, Asai T, Fujiwara K, Sahara J,  
592 Koguchi H, Fukuda N, et al. Tumor-selective mitochondrial network collapse induced by  
593 atmospheric gas plasma-activated medium. *Oncotarget*. 2016;7(15):19910-27.
- 594 34. Saito K, Asai T, Fujiwara K, Sahara J, Koguchi H, Fukuda N, et al. Tumor-selective mitochondrial  
595 network collapse induced by atmospheric gas plasma-activated medium. *Oncotarget*.  
596 2016;7(15):19910-27.
- 597 35. Suzuki-Karasaki Y, Fujiwara K, Saito K, Suzuki-Karasaki M, Ochiai T, Soma M. Distinct effects of  
598 TRAIL on the mitochondrial network in human cancer cells and normal cells: role of plasma  
599 membrane depolarization. *Oncotarget*. 2015;6(25):21572-88.
- 600 36. Forman HJ, Kim E. Inhibition by linoleic acid hydroperoxide of alveolar macrophage  
601 superoxide production: effects upon mitochondrial and plasma membrane potentials. *Arch*  
602 *Biochem Biophys*. 1989;274(2):443-52.

- 603 37. Mokhtari H, Farahmand L, Yaserian K, Jalili N, Majidzadeh-A K. The antiproliferative effects of  
604 cold atmospheric plasma-activated media on different cancer cell lines, the implication of  
605 ozone as a possible underlying mechanism. *J Cell Physiol.* 2019;234(5):6778-82.
- 606 38. Lunov O, Zablotskii V, Churpita O, Chánová E, Syková E, Dejneka A, et al. Cell death induced by  
607 ozone and various non-thermal plasmas: therapeutic perspectives and limitations. *Sci Rep.*  
608 2014;4:7129.
- 609 39. Lunov O, Zablotskii V, Churpita O, Lunova M, Jirsa M, Dejneka A, et al. Chemically different  
610 non-thermal plasmas target distinct cell death pathways. *Sci Rep.* 2017;7(1):600.

611

612

613

614

615

616



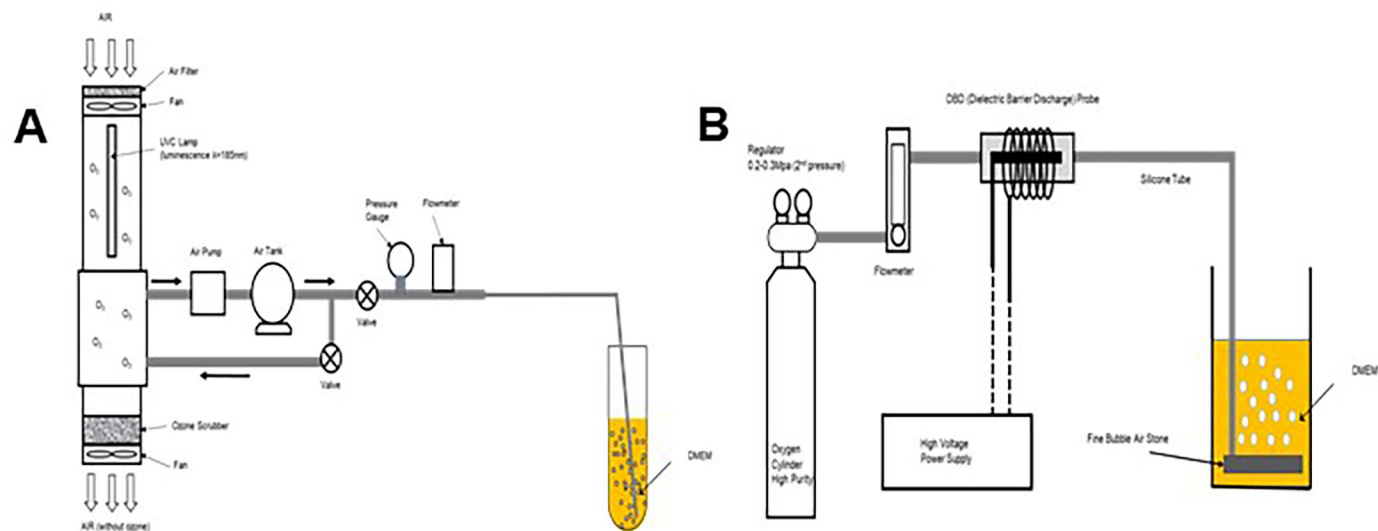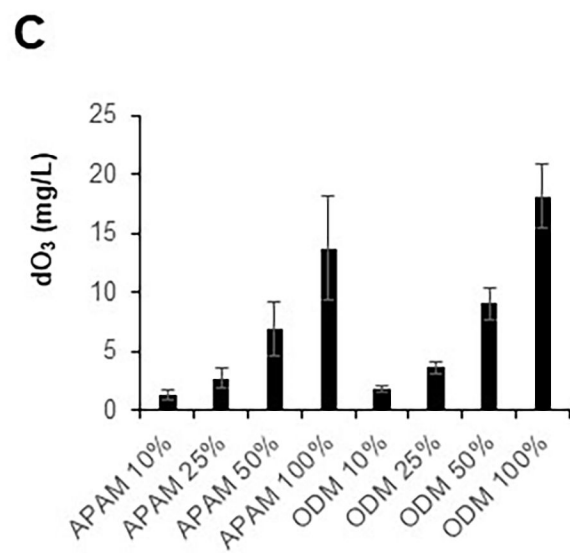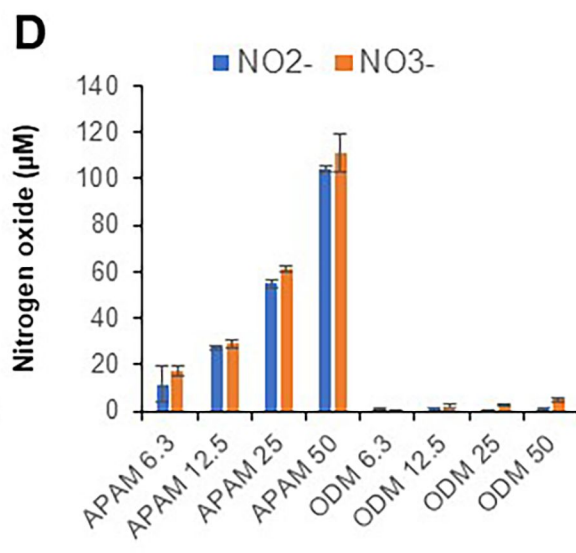

Figure 2. ODM can injure different cancer cell lines

Figure 2

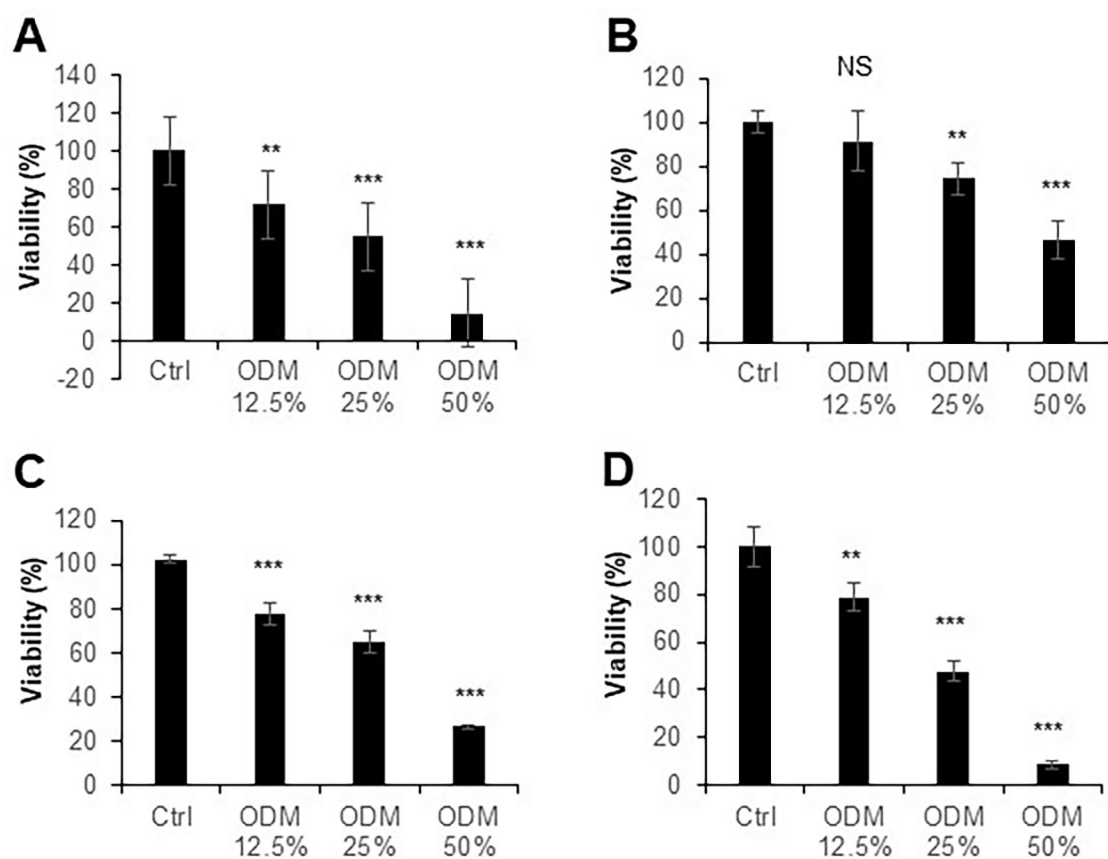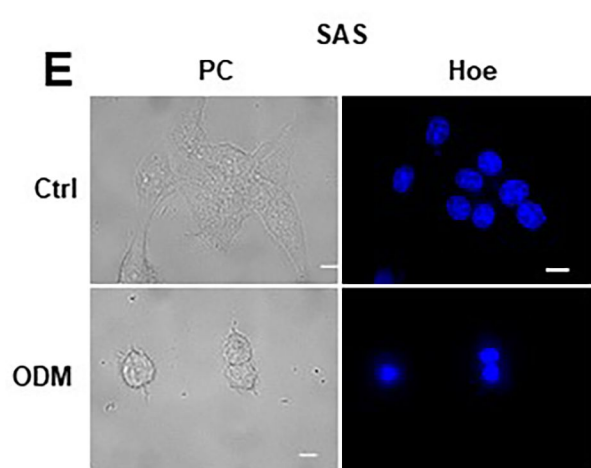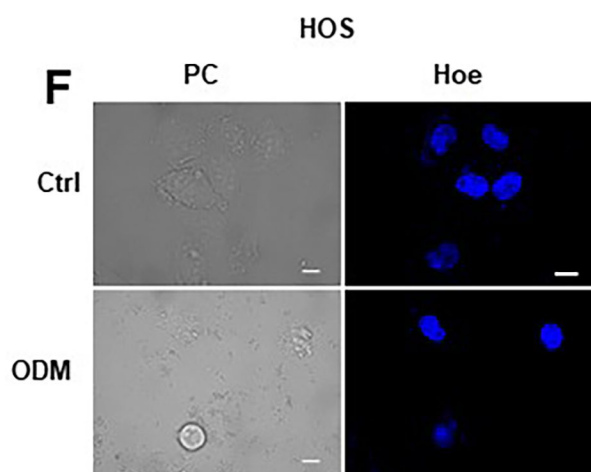

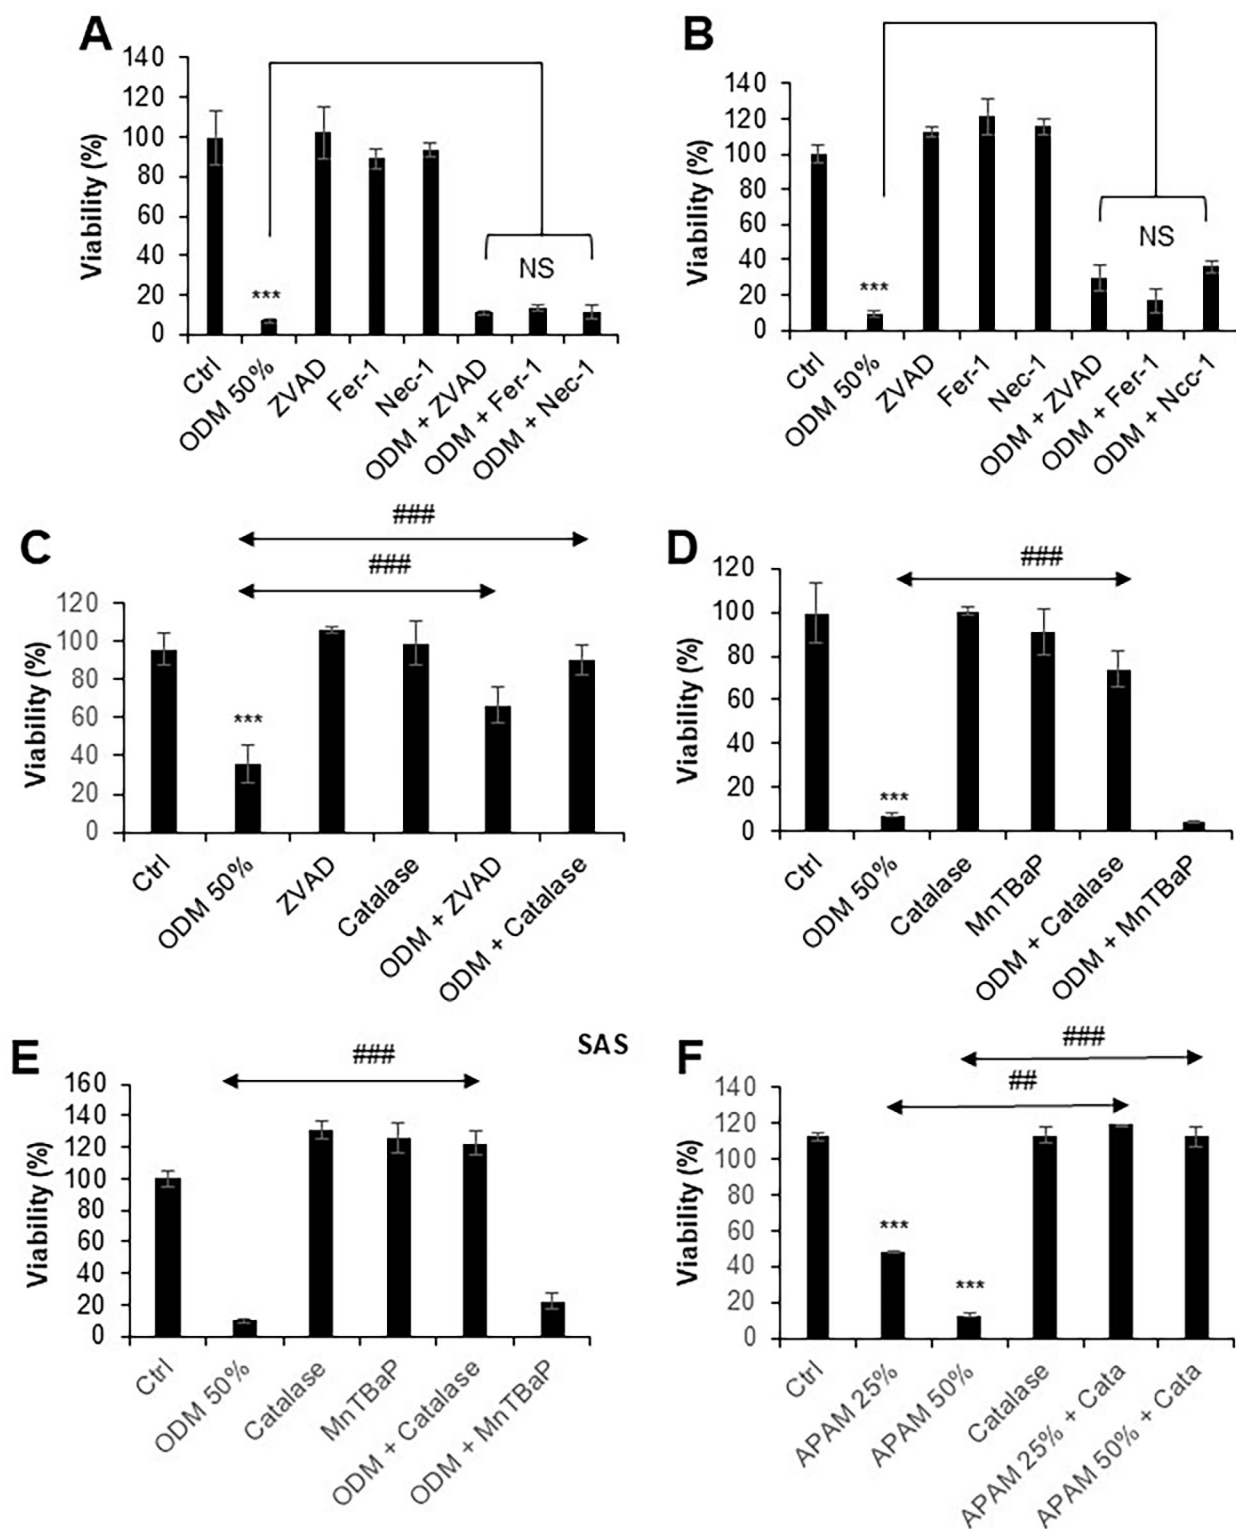

**Figure 4  
(Continued)**

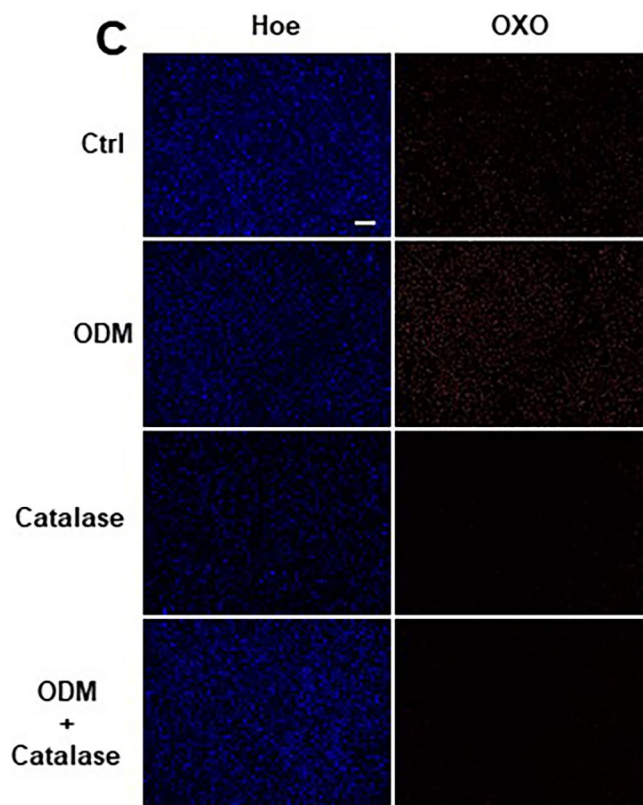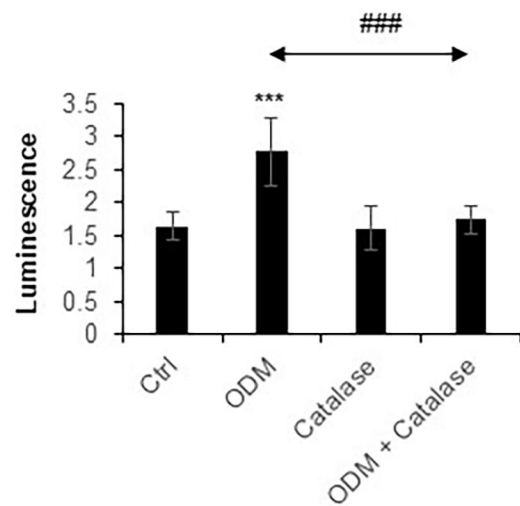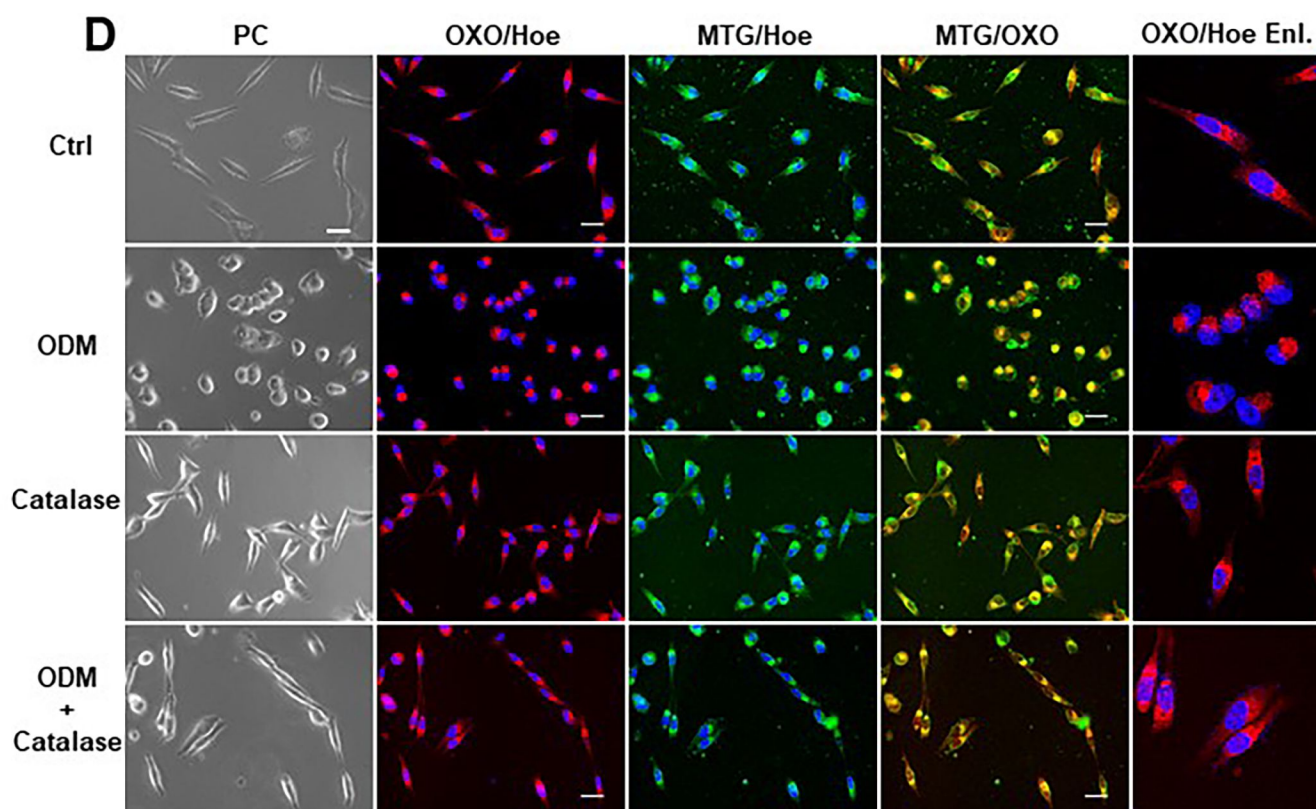

Figure 4. ODM increases different intracellular ROS in an H<sub>2</sub>O<sub>2</sub>-dependent manner

Figure 4

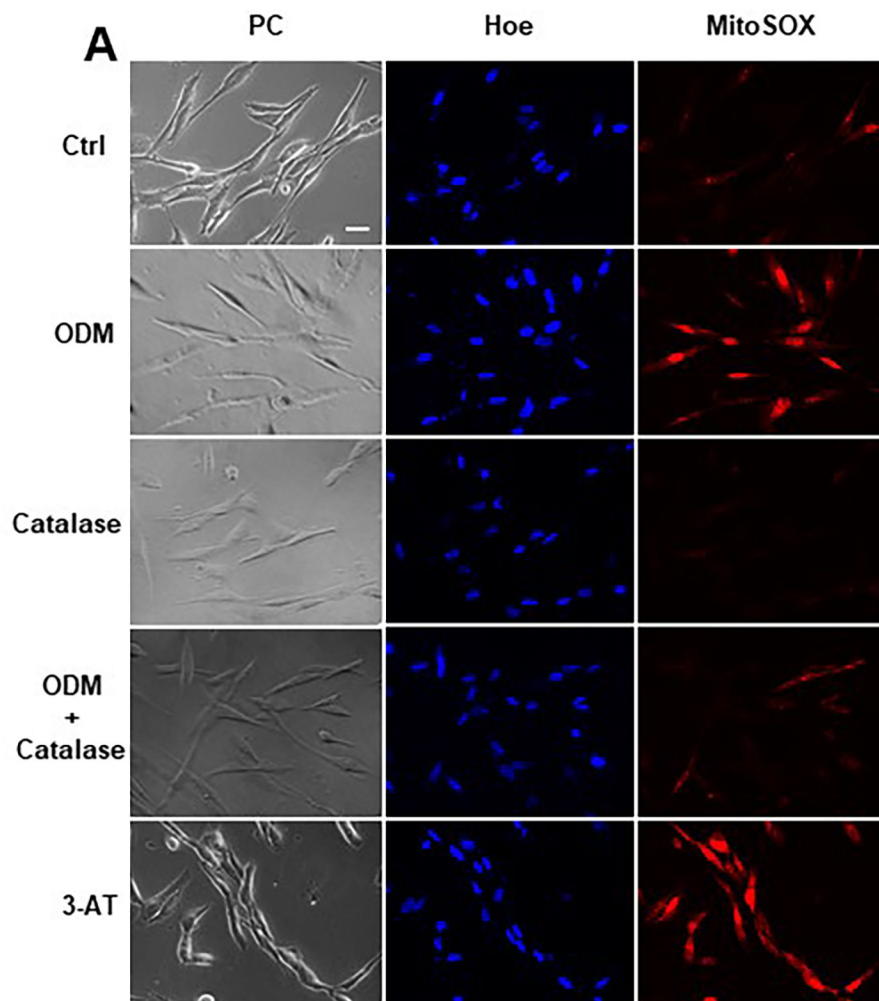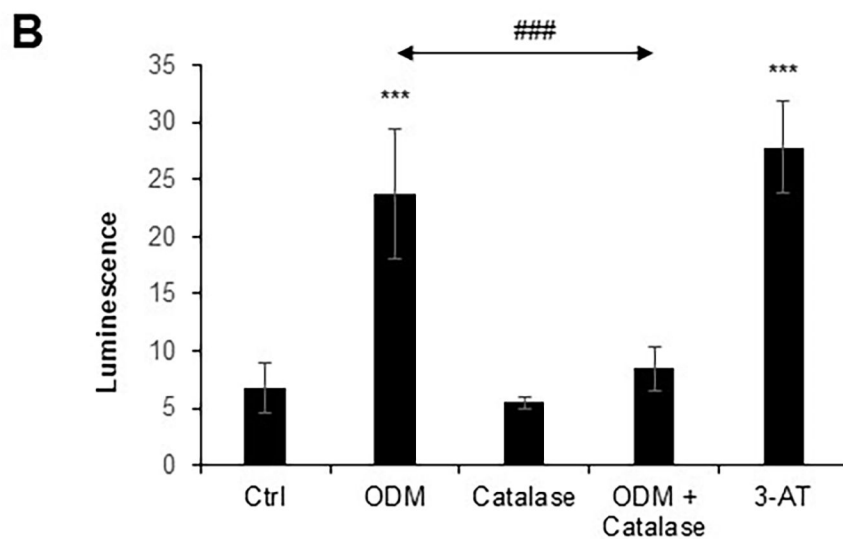



**Figure 5. BSO augments ODM-induced H<sub>2</sub>O<sub>2</sub> increase and sensitizes to cell death in insensitive cells**

**Figure 5**

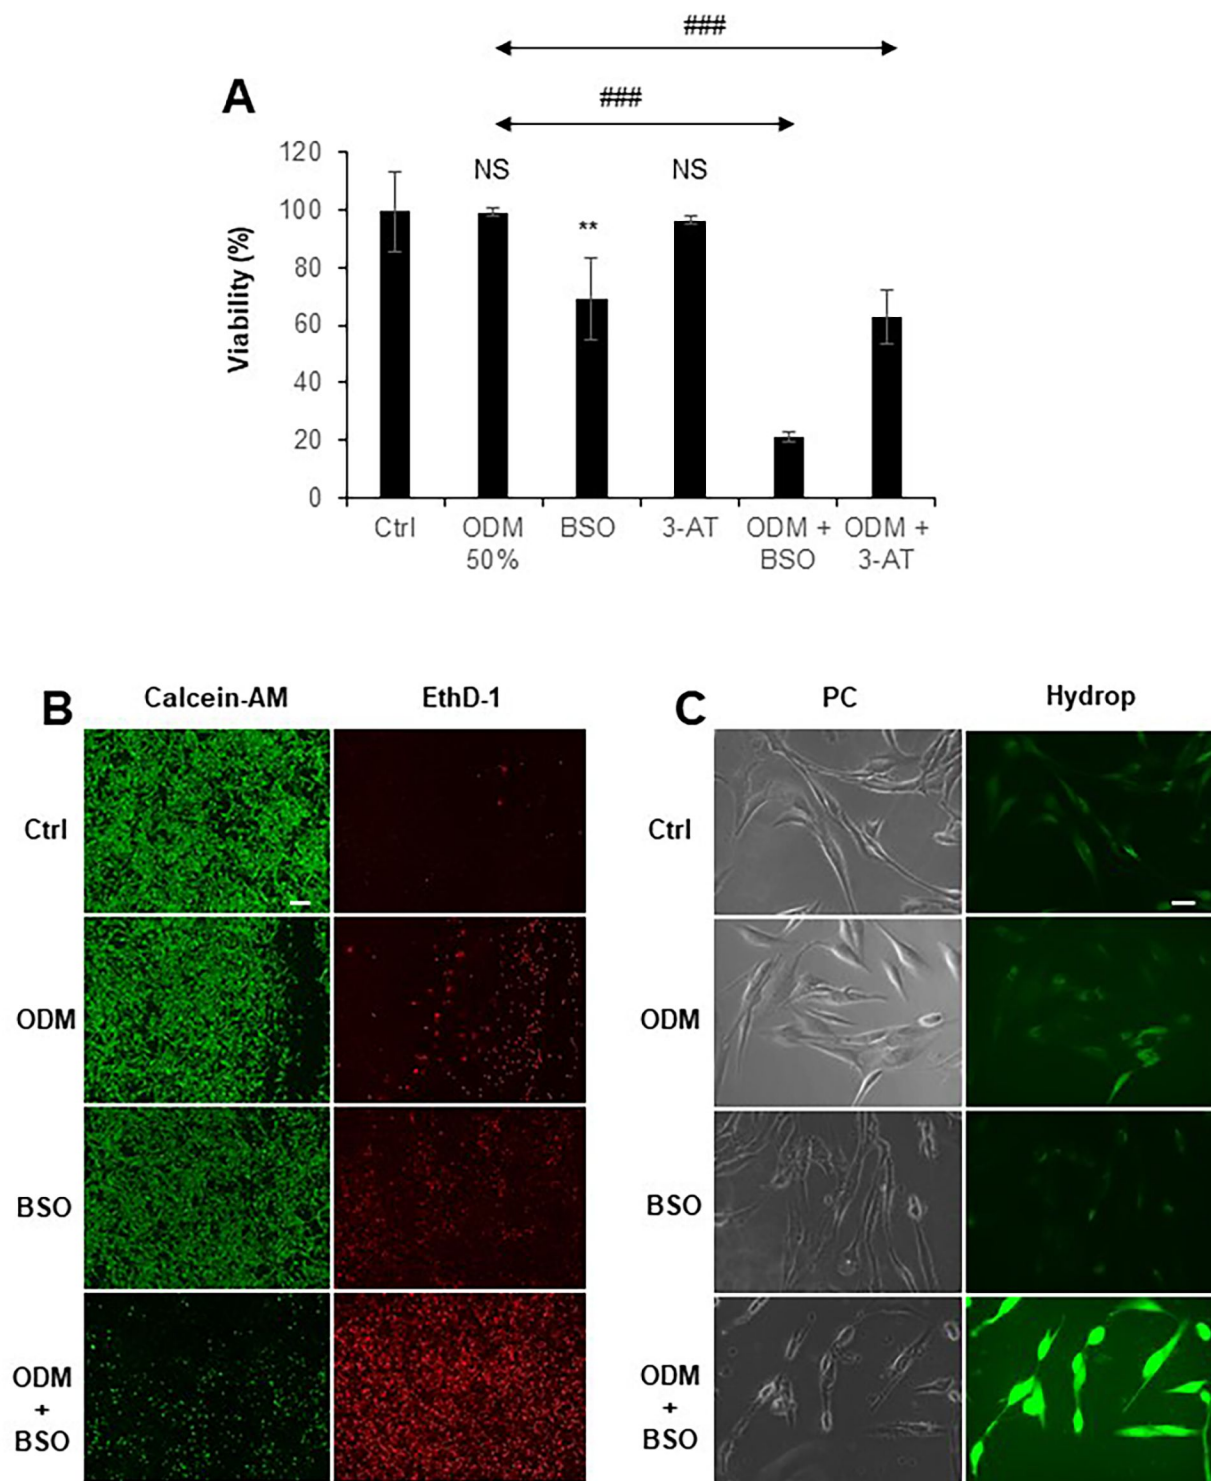

Figure 6. ODM induces MPMC and tubulin remodeling in H<sub>2</sub>O<sub>2</sub>-dependent manner

Figure 6

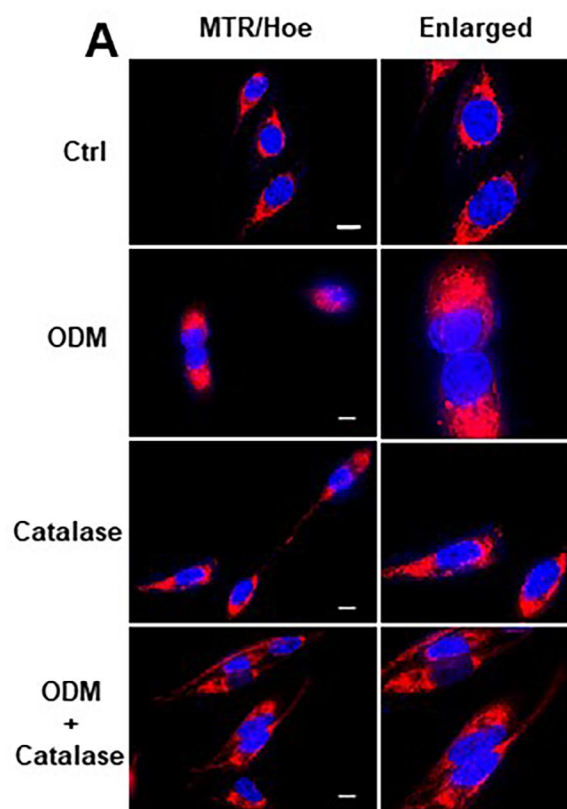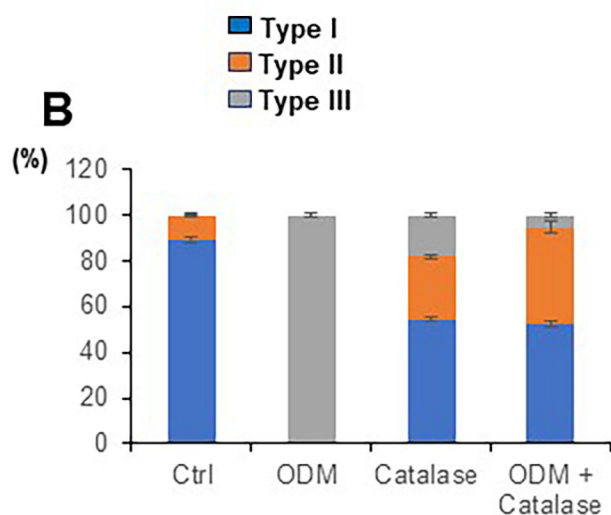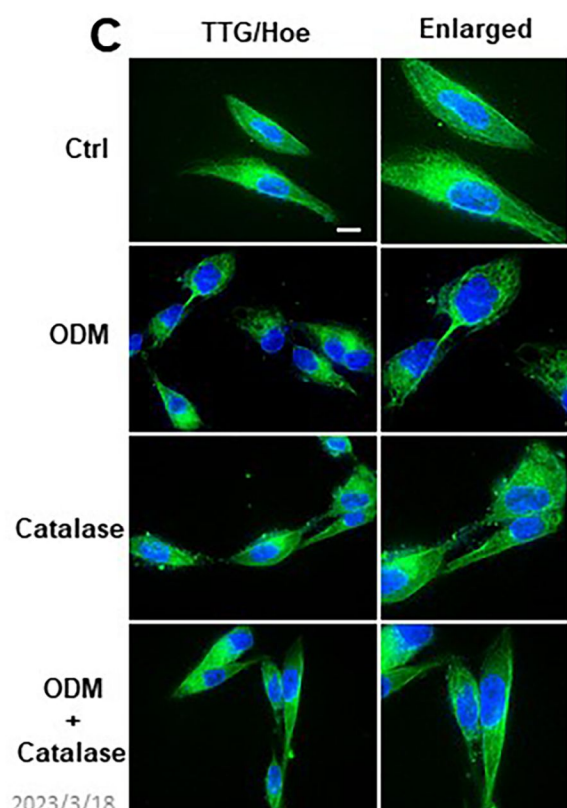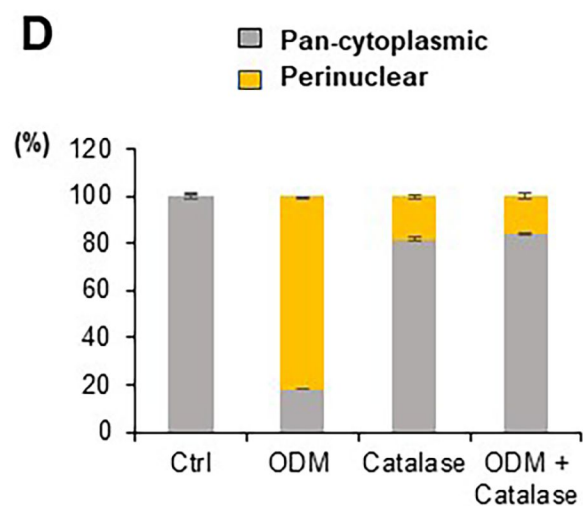

Figure 7. ODM has low cytotoxicity in nonmalignant cells

Figure 7

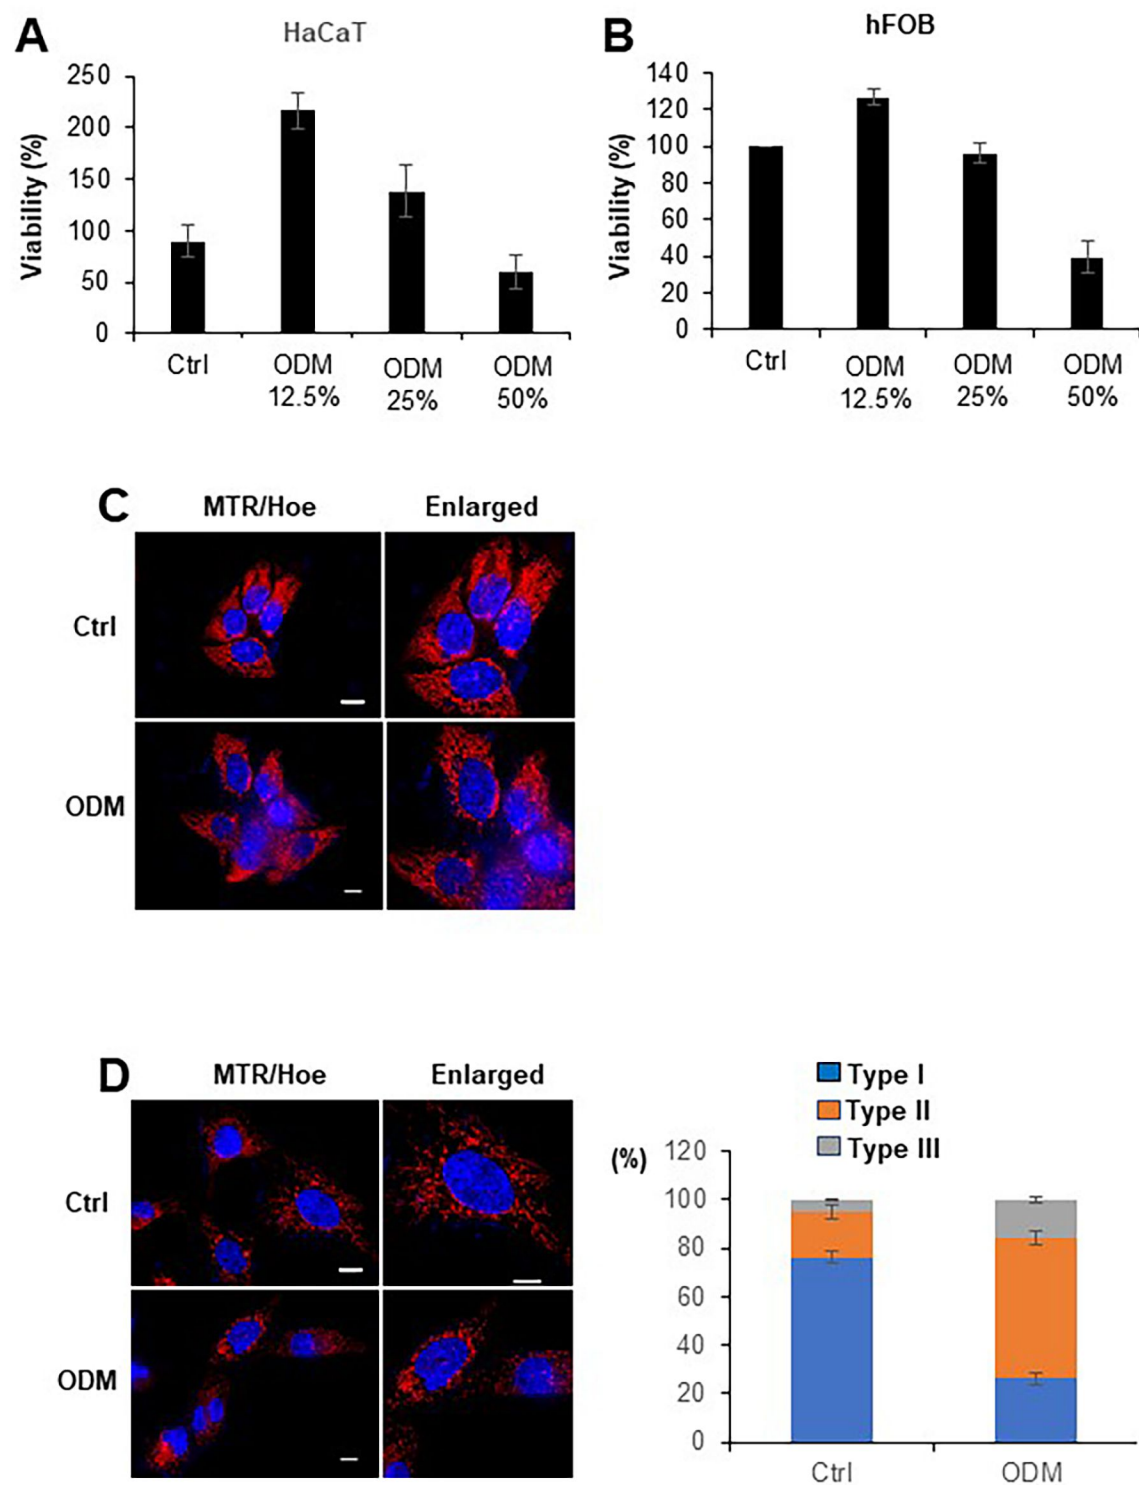

Source: http://biorxiv.org/content/10.1101/2023.03.17.533239v1.full.pdf
